# Supplementary material for: CURE-Chloroplast: A chloroplast C-to-U RNA editing predictor for seed plants
Source: PubMed Central journal article supplement (PMC2688514; doi:10.1186/1471-2105-10-135), 2009-05-08
Supplement: 1471-2105-10-135-S1.pdf [file 1471-2105-10-135-S1.pdf]

**Table S1** – RNAE performance on seed plants

| <i>Organism</i>             | RNAE   |        |       |        |        |       | CURE-Chloroplast |        |        |        |        |      |
|-----------------------------|--------|--------|-------|--------|--------|-------|------------------|--------|--------|--------|--------|------|
|                             | Sen    | Spe    | PPV   | ACC    | BA     | MCC   | Sen              | Spe    | PPV    | ACC    | BA     | MCC  |
| <i>Arabidopsis thaliana</i> | 14.29% | 96.45% | 4.76% | 95.45% | 55.37% | 0.06  | 71.43%           | 99.87% | 86.96% | 99.52% | 85.65% | 0.79 |
| <i>Nicotiana tabacum</i>    | 12.50% | 91.90% | 2.94% | 90.59% | 52.20% | 0.02  | 90.63%           | 99.84% | 82.86% | 99.76% | 95.23% | 0.87 |
| <i>Pinus thunbergii</i>     | 0.00%  | 96.88% | 0.00% | 96.14% | 48.44% | -0.02 | 64.29%           | 99.02% | 52.94% | 98.43% | 81.65% | 0.58 |
| <i>Zea mays</i>             | 12.00% | 96.49% | 2.27% | 95.74% | 54.25% | 0.04  | 96.00%           | 99.97% | 96.00% | 99.94% | 97.98% | 0.96 |

Yura et. al. proposed a method (RNAE) for predicting C-to-U RNA editing sites in the chloroplast of *Takakia lepidozoides*. Their method seems only to work for that particular moss organism. The Sen means sensitivity. The Spe means Specificity. PPV means positive predictive value. ACC means accuracy. BA means balanced accuracy. MCC means Matthew's correlation coefficient. The performance values of RNAE are estimated with the service at <http://cib.cf.ocha.ac.jp/~yura/RNAE/>.
